# Supplementary material for: Nucleoid localization of Hsp40 Mdj1 is important for its function in maintenance of mitochondrial DNA
Source: PubMed Central journal article supplement (PMC3750215; doi:10.1016/j.bbamcr.2013.05.012), 2013-10

## SUPPLEMENTARY MATERIAL

### ***Supplementary Figure S1. Mdj1-GFP fusion protein is functional in vivo.***

A) 10-fold dilutions of cells were plated on rich media having either glucose or glycerol as a carbon source, as indicated, and incubated at the indicated temperatures for 3 days (glucose) or 4 days (glycerol). Strains: wild-type harboring plasmid borne copy of Mdj1-GFP fusion protein (wt+Mdj1-GFP), wild-type (wt), *mdj1-Δ* ( $\Delta$ *mdj1*), *mdj1-Δ* harboring plasmid-borne copy of Mdj1-GFP ( $\Delta$ *mdj1* + Mdj1-GFP). B) Cell lysates prepared from strains used in (A) were subjected to immunoblot analysis using antibodies specific for Mdj1 and, as loading control, porin. lane 1- wt+Mdj1-GFP; lane 2-wt; lane 3- $\Delta$ *mdj1*; lane 4- $\Delta$ *mdj1* + Mdj1-GFP

### ***Supplementary Figure S2. Distribution of Mdj1 after centrifugation of mitochondrial lysates pre-treated with DNaseI.***

Lysate prepared from isolated mitochondria was incubated with DNaseI (at 10U/50  $\mu$ g of protein) for 60 min. in the cold-room with rotation before it was subjected to ultracentrifugation through a sucrose gradient (as described in "Materials and Methods"). A portion of each fraction was analyzed for mtDNA content by PCR amplification of mtDNA *ori5* fragment (mtDNA) and for protein content by immunoblot analysis using antibodies specific for Mdj1 and Abf2 as indicated.

### ***Supplementary Figure S3. Depletion of Mdj1 does not result in global protein misfolding in mitochondria from cells grown at optimal temperature.***

A, B) *mdj1-Δ* [*TETr-MDJ1*] expressing Mdj1 (wt) or harboring empty plasmid were grown at 30°C in the presence of doxycycline for 24 h to allow depletion of Mdj1 controlled by the *TETr* promoter. Isolated mitochondria (1 mg protein) were resuspended in buffer SG (200  $\mu$ l) and either keep on ice (A) or incubated at 48°C for 20 minutes (B). Mitochondria isolated from isogenic strain lacking mtDNA ( $\rho^0$ ) were used as a control, as indicated. Following lysis in the presence of 0.5% (v/v) NP-40, 1 mM PMSF and 3 mM spermidine, samples were loaded onto 3 ml of 15-40% (v/v) glycerol gradient prepared in buffer SG and centrifuged in a Beckman SW60Ti rotor for 2 h at 46,000 rpm at 4°C; fractions were collected from the top of the gradient. The protein pellet from the bottom of the tube was solubilized by incubation with a Laemmli sample buffer (Tris-HCl 60 mM pH 6.8, glycerol 20%, sodium dodecyl sulfate 2%,  $\beta$ -mercaptoethanol 5%, bromophenol blue 0.01%) at 95 °C. Equivalent amounts of fractions were separated by SDS-PAGE following by Coomassie Blue G staining.

### ***Supplementary Figure S4. Growth phenotypes of yeast *mdj1-Δ* cells harboring plasmid borne copies of *mdj1* mutants as the only copy of the *MDJ1* gene.***

Indicated strains were plated as 10-fold dilution series on glucose-or glycerol-rich medium and incubated at 30 °C for 3 (glucose) or 4 (glycerol) days. *mdj1-Δ* cells harboring plasmid-borne copies of: wt Mdj1 [wt]; empty vector [Vect]; Mdj1<sub>H89Q</sub> [H89Q]; Mdj1 $\Delta$ <sub>J</sub> [ $\Delta$ J]; Mdj1 $\Delta$ <sub>C</sub> [ $\Delta$ C]; J-domain containing fragment Mdj1 $\Delta$ <sub>190-511</sub> [J]; or Mdj1 $\Delta$ <sub>190-511</sub> under the control of the *TEF* promoter [ $\uparrow$ J]; Mdj1 $\Delta$ <sub>Z</sub> [ $\Delta$ Z]; Mdj1 $\Delta$ <sub>D</sub> [ $\Delta$ D].

### ***Supplementary Figure S5. Lack of putative dimerization domain does not affect nucleoid localization of Mdj1<sub>H89Q</sub> and Mdj1<sub>AZ</sub> variants.***

A) Scheme of the dimerization domain lacking Mdj1<sub>H89Q $\Delta$ D</sub> and Mdj1<sub>AZ $\Delta$ D</sub> variants. N-terminal mitochondrial presequence (dashed line; aa 1-55). J-module consists of J-domain (orange; aa 55-123) followed by glycine/phenylalanine (GF) -rich linker region (light orange; aa 124-189). C-module includes C-Terminal Domain 1 (CTD1; light brown; aa 190-350) with extruding Zinc Finger Like Region (ZFLR; green; aa 230-288) and C-Terminal Domain 2 (CTD2; brown; aa 363-429). D-module is the putative dimerization domain (blue; aa 430-511). Internal deletion of Mdj1<sub>AZ</sub> is indicated by dotted line. B) Distribution of Mdj1<sub>H89Q $\Delta$ D</sub> after centrifugation of mitochondrial lysate. Mitochondrial lysates isolated from MDJ1/*mdj1-Δ* diploid cells expressing Mdj1<sub>H89Q $\Delta$ D</sub> were subjected to ultracentrifugation through a

sucrose gradient. Each fraction was analyzed for protein content using immunoblot analysis with antibodies specific for Mdj1 or, as a control, Abf2. C) Distribution of Mdj1 $_{\Delta Z\Delta D}$  after centrifugation of mitochondrial lysate (see B for details).

**Supplementary Figure S6. Presence of J-domain of Mdj1 is critical for maintenance of mtDNA.**

A) Scheme of the J-domain lacking Mdj1 $_{\Delta J}$  variant. N-terminal mitochondrial presequence (dashed line; aa 1-55). J-module consists of J-domain (orange; aa55-123) followed by glycine/phenylalanine (GF) -rich linker region (light orange; aa 124-189). C-module includes C-Terminal Domain 1 (CTD1; light brown; aa 190-350) with extruding Zinc Finger Like Region (ZFLR; green; aa 230-288) and C-Terminal Domain 2 (CTD2; brown; aa 363-429). D-module is the putative dimerization domain (blue; aa 430-511). Internal deletion of Mdj1 $_{\Delta J}$  is indicated by dotted line. B) *mdj1-Δ [TET<sup>r</sup>-MDJ1]* expressing Mdj1 (wt), Mdj1 $_{\Delta J}$  under control of the *MDJ1* promoter were grown in the presence of doxycycline. At the indicated number of generations after doxycycline addition, aliquots were collected and plated on glucose-based media. The percentage of respiring cells was taken as the ratio of the number of red colored versus the total number of colonies. C) Distribution of Mdj1 $_{\Delta J}$  after centrifugation of mitochondrial lysate. Mitochondrial lysates isolated from *MDJ1/mdj1-Δ* diploid cells expressing Mdj1 $_{\Delta J}$  were subjected to ultracentrifugation through a sucrose gradient. Each fraction was analyzed for protein content using immunoblot analysis with antibodies specific for Mdj1 or, as a control, Abf2. D) Cellular localization of Mdj1 variants. Cells expressing GFP fused to Mdj1 $_{\Delta J}$  were analyzed by fluorescence microscopy. Cellular DNA was stained with DAPI. Overlay of the two images (MERGE). Size bar (2  $\mu$ m) is shown.

# Supplementary figure S1

**A**

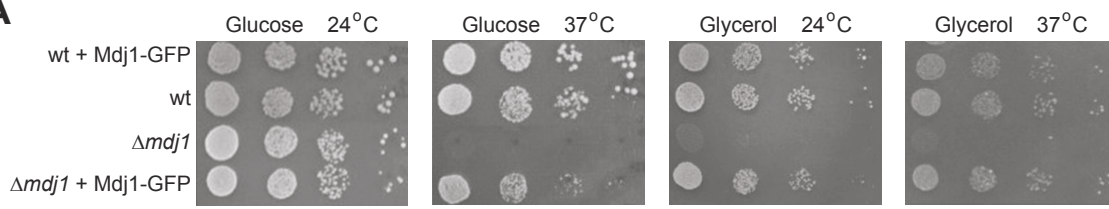

**B**

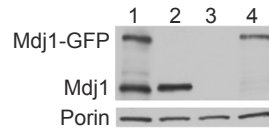

Supplementary figure S2

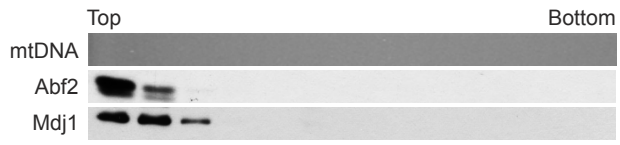

Supplementary figure S3

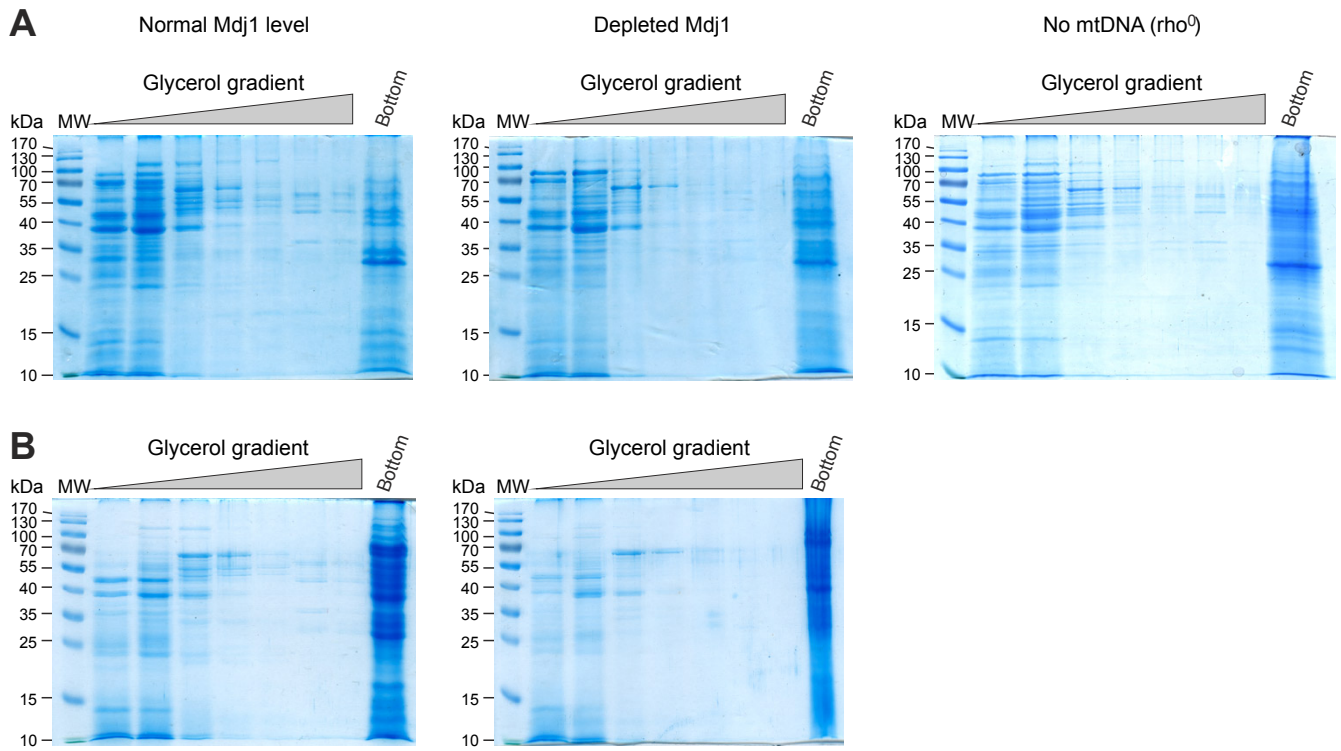

Supplementary figure S4

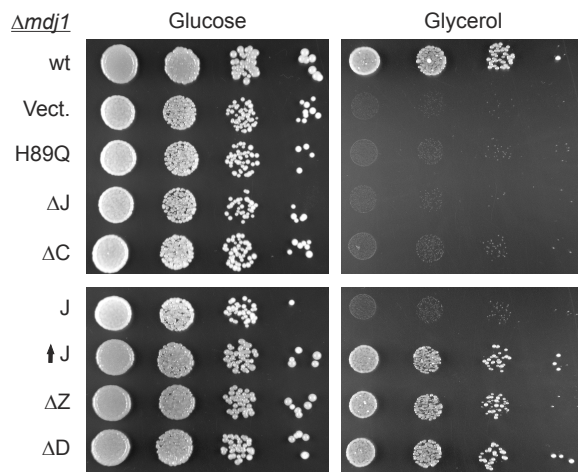

# Supplementary figure S5

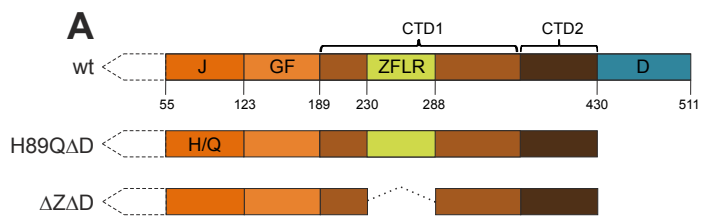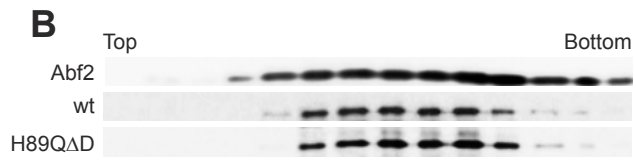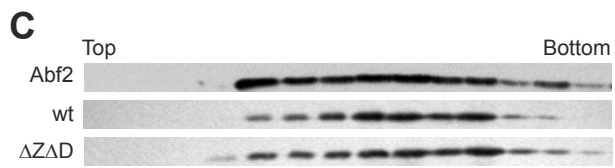

Supplementary figure S6

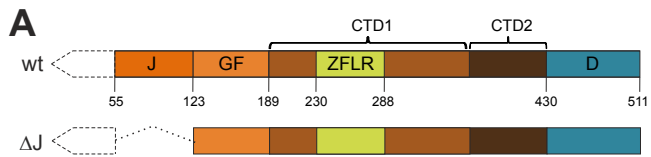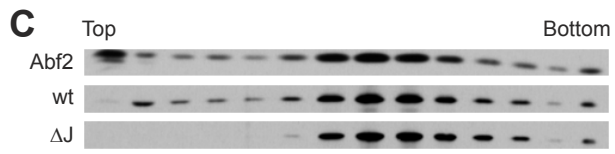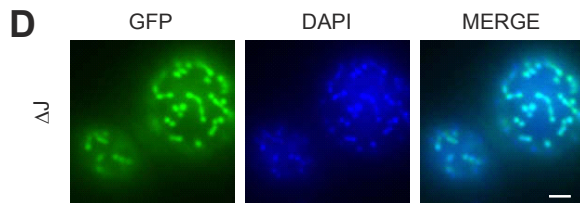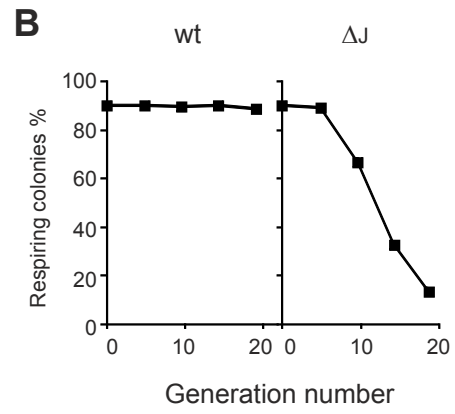

Supplement: mmc1.pdf [file mmc1.pdf]
